# Supplementary material
Source: ML conference proceedings conference paper supplement (https://proceedings.neurips.cc/paper_files/paper/2016/hash/0f96613235062963ccde717b18f97592-Abstract.html)
Supplement: Supplementary file 2 [file 0f96613235062963ccde717b18f97592-Supplemental.zip]

Archive with 1 entries (1 files):
- KrauseEtAlSupplement.pdf
